# Supplementary material for: Conyza canadensis from Jordan: Phytochemical Profiling, Antioxidant, and Antimicrobial Activity Evaluation
Source: MDPI journal article supplement (doi:10.3390/molecules29102403), 2024-05-20
Supplement: s1 [file s1]

## Supplementary

# *Conyza canadensis* from Jordan: Phytochemical Profiling, Antioxidant, and Antimicrobial Activity Evaluation

Lina M. Barhoumi<sup>1,\*</sup>, Ashok K. Shakya<sup>2,\*</sup>, O'la Al-Fawares<sup>3</sup> and Hala I. Al-Jaber<sup>1</sup>

<sup>1</sup> Chemistry Department, Faculty of Science, Al-Balqa Applied University, Al-Salt 19117, Jordan; hala.aljaber@bau.edu.jo

<sup>2</sup> Pharmacological and Diagnostic Research Center, Faculty of Pharmacy, Al-Ahliyya Amman University, Amman 19328, Jordan

<sup>3</sup> Medical Laboratory Sciences Department, Faculty of Science, Al-Balqa Applied University, Al-Salt 19117, Jordan; ola.alfawares@bau.edu.jo

\* Correspondence: linabrhoumi@bau.edu.jo (L.M.B.); ak\_shakya@ammanu.edu.jo (A.K.S.)

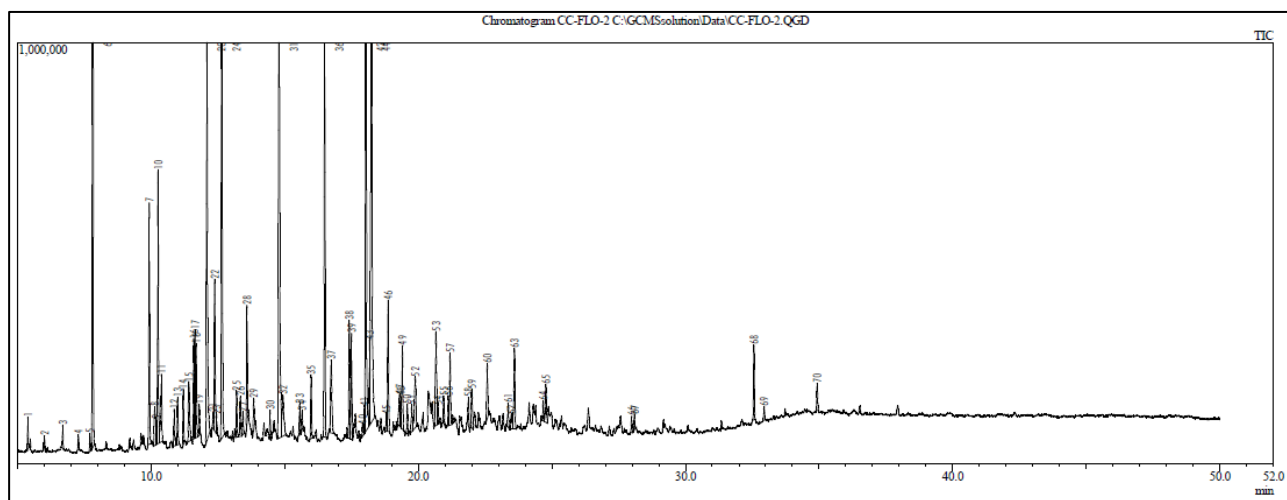

**Figure S1** GC-MS for CCHD-EO of inflorescence heads

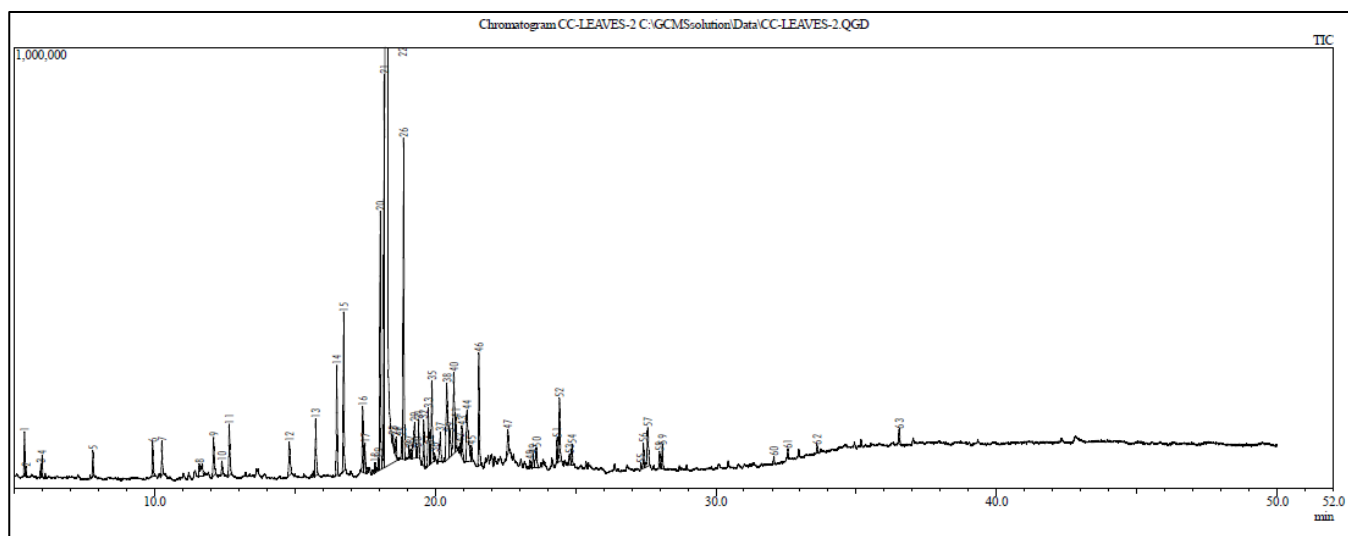

**Figure S2** GC-MS for CCHD-EO of leaves

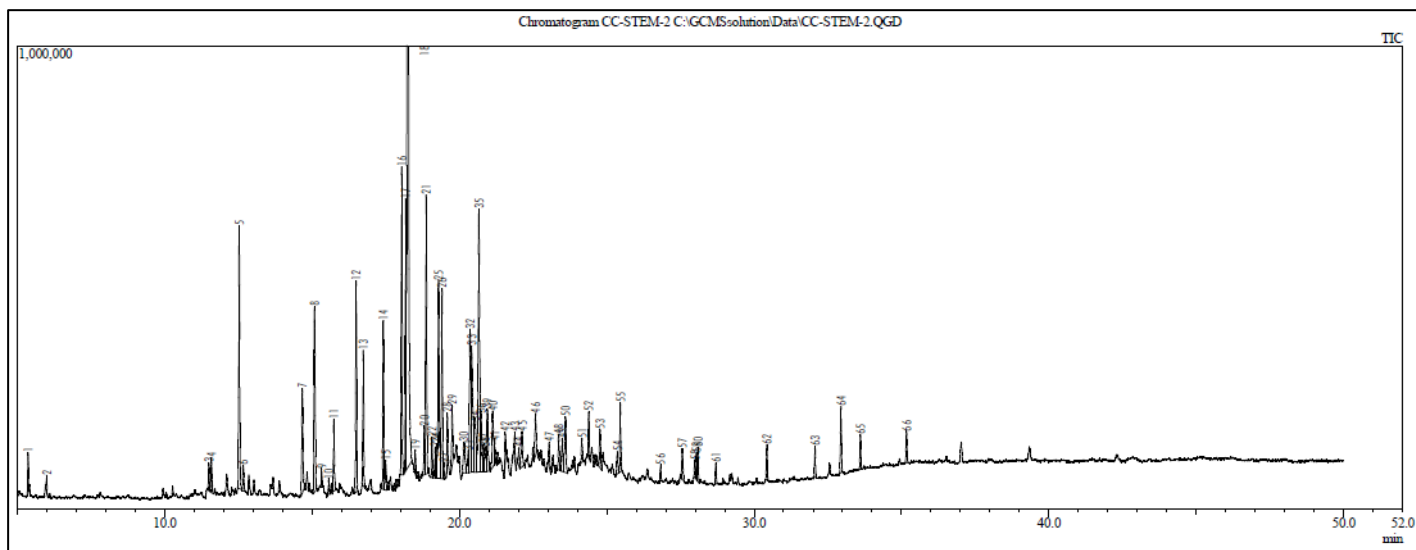

**Figure S3** GC-MS for CCHD-EO of stems.

**Table S1** The LOD, LOQ, range, fragments and supplier for the standard phenolic compounds and flavonoids used in LC-MS/MS analysis

| No.                | Compound name           | Molecular Formula                              | Structural formula                                                                   | $R_t$ (min) | LOD(LOQ) ng/mL | Range ng/mL | Fragments      | Supplier              |
|--------------------|-------------------------|------------------------------------------------|--------------------------------------------------------------------------------------|-------------|----------------|-------------|----------------|-----------------------|
| Phenolic Compounds |                         |                                                |                                                                                      |             |                |             |                |                       |
| 1.                 | Vanillic acid           | C <sub>8</sub> H <sub>8</sub> O <sub>4</sub>   | 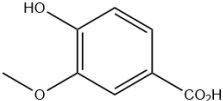    | 3.217       | 100 (300)      | 300-8000    | 166.828/107.80 | MilliporeSigma, (USA) |
| 2.                 | Syringic acid           | C <sub>9</sub> H <sub>10</sub> O <sub>5</sub>  |    | 3.598       | 100 (300)      | 300-8000    | 196.912/152.80 | Biosynth (UK)         |
| 3.                 | <i>p</i> -Coumaric acid | C <sub>9</sub> H <sub>8</sub> O <sub>3</sub>   |    | 4.449       | 100 (300)      | 300-8000    | 163.221/118.80 | Biosynth (UK)         |
| 4.                 | Ferulic acid            | C <sub>10</sub> H <sub>10</sub> O <sub>4</sub> |   | 4.800       | 100 (300)      | 300-8000    | 192.766/133.80 | Biosynth (UK)         |
| 5.                 | Resveratrol             | C <sub>14</sub> H <sub>12</sub> O <sub>3</sub> |  | 5.561       | 100 (300)      | 300-8000    | 226.946/184.80 | MilliporeSigma, (USA) |

|    |                    |                                                 |                                                                                      |       |           |          |                |                            |
|----|--------------------|-------------------------------------------------|--------------------------------------------------------------------------------------|-------|-----------|----------|----------------|----------------------------|
| 6. | Rosmarinic acid    | C <sub>18</sub> H <sub>16</sub> O <sub>8</sub>  | 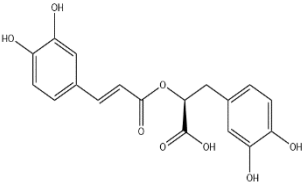   | 5.863 | 100 (300) | 300-8000 | 358.782/160.80 | Extrasynthese,<br>(France) |
| 7. | Salvianolic acid B | C <sub>36</sub> H <sub>30</sub> O <sub>16</sub> |    | 6.151 | 100 (300) | 300-8000 | 716.709/518.70 | Extrasynthese,<br>(France) |
| 8. | Salvianolic acid A | C <sub>26</sub> H <sub>22</sub> O <sub>10</sub> |   | 6.948 | 100 (300) | 300-8000 | 492.732/294.70 | Extrasynthese,<br>(France) |
| 9. | Chlorogenic acid   | C <sub>16</sub> H <sub>18</sub> O <sub>9</sub>  |  | 7.560 | 100 (300) | 300-8000 | 252.877/96.90  | Sigma-<br>Aldrich(USA)     |

|                   |                                     |                                                 |                                                                                      |        |           |          |                                 |                         |
|-------------------|-------------------------------------|-------------------------------------------------|--------------------------------------------------------------------------------------|--------|-----------|----------|---------------------------------|-------------------------|
| 10.               | Caffeic acid phenethyl ester (CAPE) | C <sub>17</sub> H <sub>16</sub> O <sub>4</sub>  | 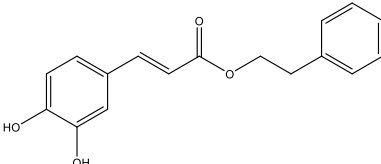   | 9.215  | 100 (300) | 300-8000 | 282.845/178.600                 | Sigma-Aldrich(USA)      |
| 11.               | Gallic acid                         | C <sub>7</sub> H <sub>6</sub> O <sub>5</sub>    |     | 9.467  | 100 (300) | 300-8000 | 168.904/124.800                 | Sigma-Aldrich(USA)      |
| 12.               | Carnosic acid                       | C <sub>20</sub> H <sub>28</sub> O <sub>4</sub>  |    | 20.693 | 100 (300) | 300-8000 | 330.989/286.800                 | Extrasynthese, (France) |
| <b>Flavonoids</b> |                                     |                                                 |                                                                                      |        |           |          |                                 |                         |
| 1.                | Catechin                            | C <sub>15</sub> H <sub>14</sub> O <sub>6</sub>  |  | 2.005  | 100 (300) | 300-8000 | 288.837/244.600                 | MilliporeSigma (USA)    |
| 2.                | Hesperidin                          | C <sub>28</sub> H <sub>34</sub> O <sub>15</sub> |  | 5.599  | 100 (300) | 300-8000 | 608.785/300.70, 608.785/163.600 | MilliporeSigma (USA)    |

|    |                        |                      |                                                                                      |       |           |          |                 |                         |
|----|------------------------|----------------------|--------------------------------------------------------------------------------------|-------|-----------|----------|-----------------|-------------------------|
| 3. | Rutin                  | $C_{27}H_{30}O_{16}$ | 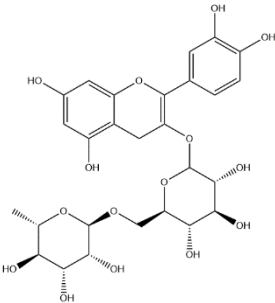   | 5.856 | 100 (300) | 300-8000 | 608.799/299.700 | MilliporeSigma (USA)    |
| 4. | Apigenin-7-O-glucoside | $C_{21}H_{20}O_{10}$ |    | 6.172 | 100 (300) | 300-8000 | 430.757/267.700 | Extrasynthese, (France) |
| 5. | Hesperetin             | $C_{16}H_{14}O_6$    |   | 6.992 | 100 (300) | 300-8000 | 300.746/163.700 | MilliporeSigma (USA)    |
| 6. | Quercetin              | $C_{15}H_{10}O_7$    |  | 7.194 | 100 (300) | 300-8000 | 300.725/150.800 | Sigma-Aldrich (USA)     |

|    |                     |                                                |                                                                                     |       |           |          |                 |                           |
|----|---------------------|------------------------------------------------|-------------------------------------------------------------------------------------|-------|-----------|----------|-----------------|---------------------------|
| 7. | Luteolin            | C <sub>15</sub> H <sub>10</sub> O <sub>6</sub> | 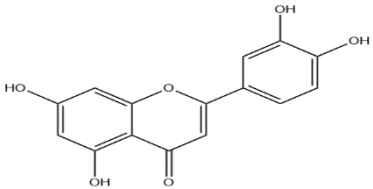  | 7.265 | 100 (300) | 300-8000 | 284.726/132.800 | Extrasynthese,<br>(France |
| 8. | Apigenin            | C <sub>15</sub> H <sub>10</sub> O <sub>5</sub> |   | 8.097 | 100 (300) | 300-8000 | 268.810/116.900 | Extrasynthese,<br>(France |
| 9. | 3-O-Methylquercetin | C <sub>16</sub> H <sub>12</sub> O <sub>7</sub> |  | 8.031 | 100 (300) | 300-8000 | 314.404/299.600 | MilliporeSigma<br>(USA    |

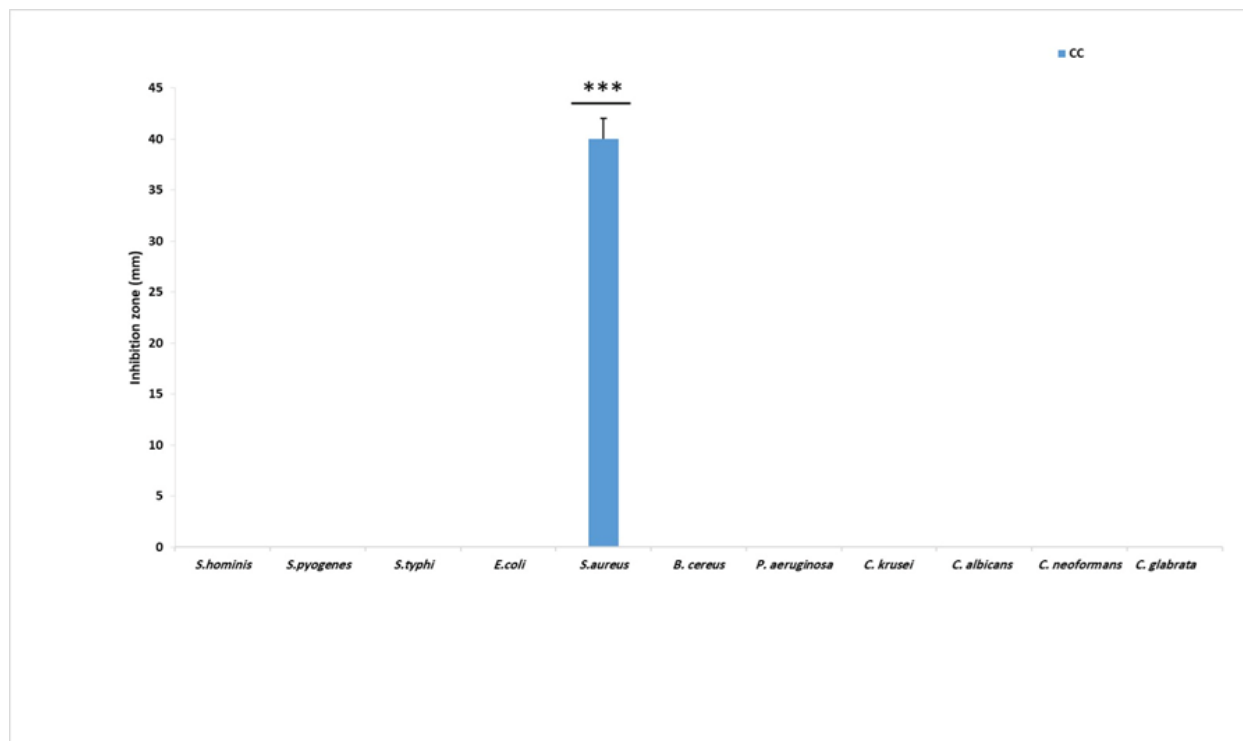

**Figure S4** Zone of inhibition bar graph introduced by CCM against studied microorganisms.

\*\*\*The asterisks indicate a significance of  $P < 0.001$
